# Supplementary material for: Substitution at the C-3 Position of Catechins Has an Influence on the Binding Affinities against Serum Albumin
Source: MDPI journal article supplement (doi:10.3390/molecules22020314), 2017-02-18
Supplement: s1 [file s1]

## Supplementary Materials: The C-3 Position of Catechins Regulates their Binding Affinities against Serum Albumin

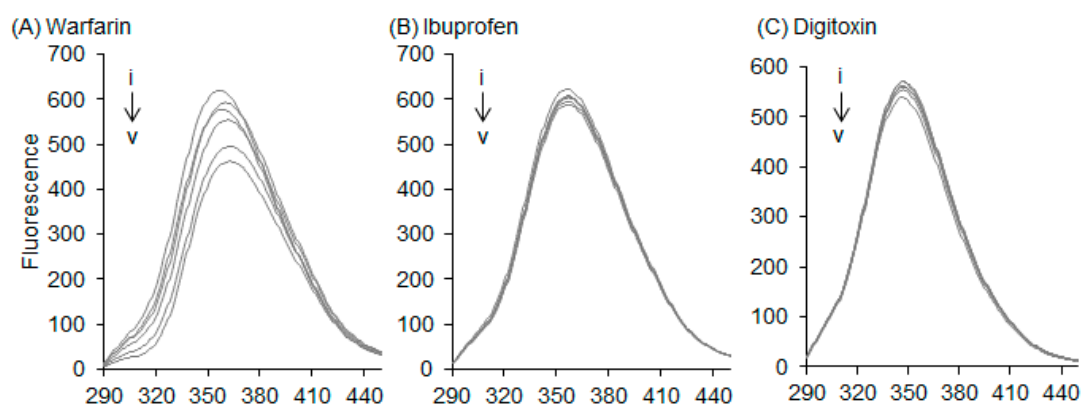

**Figure S1.** Effect of drug binding site specific-chemicals on fluorescence of BSA. Fluorescence spectrum of 0.3 mg/mL BSA with various concentrations of warfarin (A) for drug-binding site I, ibuprofen (B) for site II and digitoxin (C) for site III was measured with an excitation wavelength at 280 nm. Symbols i, ii, iii, iv, and v show the spectrum of BSA with 0, 1, 5, 12.5, 25, and 50  $\mu\text{M}$  compounds, respectively.
